# Supplementary material for: Comparison of identifiable and non-identifiable data linkage: health technology assessment of MitraClip using registry, administrative and mortality datasets
Source: PubMed Central journal article supplement — BMJ Health Care Inform. 2021 Apr 5;28(1):e100223. doi: 10.1136/bmjhci-2020-100223 (PMC8030467; doi:10.1136/bmjhci-2020-100223), 2021-04-05

**Supplement 1\_online\_supp:** Valid diagnosis (ICD) and procedure (OPCS) codes used to identify cohort of interest extracted from HES (Note all procedure codes from K chapter were required to be supplemented by at least one of the listed procedure codes from the Y chapter†). KEY: NEC: not elsewhere classified, NOC: not otherwise classifiable)

|            | Code   | Description                                                           |
|------------|--------|-----------------------------------------------------------------------|
| Diagnosis  | I05.2  | Mitral stenosis with insufficiency                                    |
|            | I05.8  | Other mitral valve diseases                                           |
|            | I05.9  | Mitral valve disease, unspecified                                     |
|            | I08.0  | Disorders of both mitral and aortic valves                            |
|            | I08.1  | Disorders of both mitral and tricuspid valves                         |
|            | I08.3  | Combined disorders of mitral, aortic and tricuspid valves             |
|            | I34    | Mitral (valve) insufficiency                                          |
|            | Q23.3  | Congenital mitral insufficiency                                       |
| Procedural | *K25.3 | Prosthetic replacement of mitral valve                                |
|            | K25.5  | Mitral valve repair NEC                                               |
|            | K25.8  | Other specified plastic repair of mitral valve                        |
|            | K25.9  | Unspecified plastic repair of mitral valve                            |
|            | K30.1  | Revision of plastic repair of mitral valve                            |
|            | K30.8  | Other specified revision of plastic repair of valve of heart          |
|            | K30.9  | Unspecified revision of plastic repair of valve of heart              |
|            | K35.1  | Percutaneous transluminal mitral valvotomy                            |
|            | K35.5  | Percutaneous transluminal valvuloplasty                               |
|            | K35.8  | Other specified therapeutic transluminal operations on valve of heart |
|            | K35.9  | Unspecified therapeutic transluminal operations on valve of heart     |
|            | †Y02.1 | Implantation of prosthesis into organ NOC                             |
|            | †Y02.2 | Insertion of prosthesis into organ NOC                                |
|            | †Y02.8 | Other specified placement of prosthesis in organ NOC                  |
|            | †Y02.9 | Unspecified placement of prosthesis in organ NOC                      |
|            | †Y07.2 | Clipping of organ NOC                                                 |

\*Note one hospital used K25.3 + Y02.1 procedure codes for MitraClip procedures conducted prior to 1<sup>st</sup> August 2016

**Supplement 2\_online\_supp:** Cohort identification.

Search criteria: Any finished consultant episode of care (FCE=1) discharged between 1st April 2014 and 31st March 2018, age at admission > 18 years (STARTAGE), including procedure code (OPERTN1-24: K253|4|5|8|9|K301|8|9|K351|5|8|9|+Y072|Y021|2|8|9) or diagnosis (DIAG1-20: I080|1|3|I052|8|9|I34|Q233) from hospitals submitting to registry (PROCEDURE3: RA7|RJE|RLY|RM2|R0A|RRK|RT3)

**Supplement 3\_online\_supp: Comprehensive cleaning of HES data****STEP 1: Episode cleaning**

- Episodes with missing or invalid (“-1”) spell number as generated by SUS (SUSSPELLID) were removed.
- Episodes with missing spell number as generated by provider hospital (PROVSPNOPS) were removed.
- Patients (ENCRYPTED\_HESID) from identified episodes were searched in mortality database, and any marked with subsequent activity after date of death (SUBSEQUENT\_ACTIVITY=Y) or date of death (DOD) before tonsillectomy admission date (ADMIDATE) were removed

**STEP 2: Spell aggregation**

- Some admissions (also called spells) are made up of multiple episodes of care, therefore episodes were aggregated together into spells if they had the same unique spell number as generated by SUS (SUSSPELLID).
- Episodes with missing spell number as generated by provider hospital (PROVSPNOPS) were removed.
- Episodes within a spell were ordered by episode order (EPIORDER) and start episode flag (EPISTART).

**STEP 3: Spell cleaning**

- Missing or invalid (“1800-01-01” or “1801-01-01”) values of admission date (ADMIDATE) were replaced with NULL.
- Missing or invalid (“1800-01-01” or “1801-01-01”) values of discharge date (DISDATE) were replaced with NULL.
- Missing or invalid (e.g. “011800”) values of month and year of birth (MYDOB) were replaced with NULL.
- Spells with inconsistent patient identifier (ENCRYPTED\_HESID) were removed.
- Spells with inconsistent admission date (ADMIDATE) were removed.
- Spells with a missing spell start (SPELBGIN) or missing spell end (SPELEND) flag or missing starting episode (EPIORDER=1) were removed.
- Spells with missing admission date (ADMIDATE) were removed.
- Spells with missing discharge date (DISDATE) and missing last episode (EPIEND) were removed.

**STEP 4: Index tonsillectomy admission**

- As some patients can have multiple tonsillectomy procedures, the earliest procedure within our study time frame (i.e. index procedure) was identified for each patient (ENCRYPTED\_HESID) using minimum admission date (ADMIDATE).
- Any remaining duplicates were removed by retaining only the spell with the highest spell number as generated by SUS (SUSSPELLID).

**STEP 5: Longitudinal cleaning**

- Episodes with missing or invalid (“-1”) spell number as generated by SUS (SUSPELLID) were removed (prior to spell aggregation of follow-up spells).
- Episodes with missing spell number as generated by provider hospital (PROVSPNOPS) were removed.
- Missing or invalid (“1800-01-01” or “1801-01-01”) values of admission date (ADMIDATE) were replaced with NULL.
- Missing or invalid (“1800-01-01” or “1801-01-01”) values of discharge date (DISDATE) were replaced with NULL.
- Missing or invalid (e.g. “011800”) values of month and year of birth (MYDOB) were replaced with NULL.
- Mortality records with a reported date of death which was one day prior to tonsillectomy discharge were corrected to the date of tonsillectomy discharge.

**Supplement 4\_online\_supp:** OPCS codes used to identify cardiac interventions conducted post-MitraClip implantation (recorded during subsequent readmissions).

|                                      |                                            | Code                                                                   | Description                                    |
|--------------------------------------|--------------------------------------------|------------------------------------------------------------------------|------------------------------------------------|
| Mitral valve intervention            | Replace                                    | K25.1                                                                  | Allograft replacement of mitral valve          |
|                                      |                                            | K25.2                                                                  | Xenograft replacement of mitral valve          |
|                                      |                                            | K25.3                                                                  | Prosthetic replacement of mitral valve         |
|                                      |                                            | K25.4                                                                  | Replacement of mitral valve NEC                |
|                                      | Repair                                     | K25.5                                                                  | Mitral valve repair NEC                        |
|                                      |                                            | K25.8                                                                  | Other specified plastic repair of mitral valve |
|                                      |                                            | K25.9                                                                  | Unspecified plastic repair of mitral valve     |
|                                      |                                            | K30.1                                                                  | Revision of plastic repair of mitral valve     |
|                                      | Other                                      | K31.1                                                                  | Open mitral valvotomy                          |
|                                      |                                            | K32.1                                                                  | Close mitral valvotomy                         |
|                                      |                                            | K34.1                                                                  | Annuloplasty of mitral valve                   |
|                                      |                                            | K35.1                                                                  | Percutaneous transluminal mitral valvotomy     |
|                                      |                                            | K37.5                                                                  | Excision of supramitral ring                   |
| K38.3                                |                                            | Operation on mitral subvalvar apparatus                                |                                                |
|                                      | *Z32.1                                     | Mitral valve                                                           |                                                |
| Cardiac pacemaker insertion          | K60.1                                      | Implantation of intravenous cardiac pacemaker system NEC               |                                                |
|                                      | K60.5                                      | Implantation of intravenous single chamber cardiac pacemaker system    |                                                |
|                                      | K60.6                                      | Implantation of intravenous dual chamber cardiac pacemaker system      |                                                |
|                                      | K60.7                                      | Implantation of intravenous biventricular cardiac pacemaker system     |                                                |
|                                      | K60.8                                      | Other specified cardiac pacemaker system introduced through vein       |                                                |
|                                      | K60.9                                      | Unspecified cardiac pacemaker system introduced through vein           |                                                |
|                                      | K61.1                                      | Implantation of cardiac pacemaker system NEC                           |                                                |
|                                      | K61.5                                      | Implantation of single chamber cardiac pacemaker system                |                                                |
|                                      | K61.6                                      | Implantation of dual chamber cardiac pacemaker system                  |                                                |
|                                      | K61.7                                      | Implantation of biventricular cardiac pacemaker system                 |                                                |
|                                      | K61.8                                      | Other specified other cardiac pacemaker system                         |                                                |
| K61.9                                | Unspecified other cardiac pacemaker system |                                                                        |                                                |
| Cardioverter defibrillator insertion | K59.1                                      | Implantation of cardioverter defibrillator using one electrode lead    |                                                |
|                                      | K59.2                                      | Implantation of cardioverter defibrillator using two electrode leads   |                                                |
|                                      | K59.6                                      | Implantation of cardioverter defibrillator using three electrode leads |                                                |
|                                      | K59.7                                      | Renewal of cardioverter defibrillator using three electrode leads      |                                                |
|                                      | K59.8                                      | Other specified cardioverter defibrillator introduced through the vein |                                                |
|                                      | K59.9                                      | Unspecified cardioverter defibrillator introduced through the vein     |                                                |

Supplement 5\_online\_supp: Data flow diagram

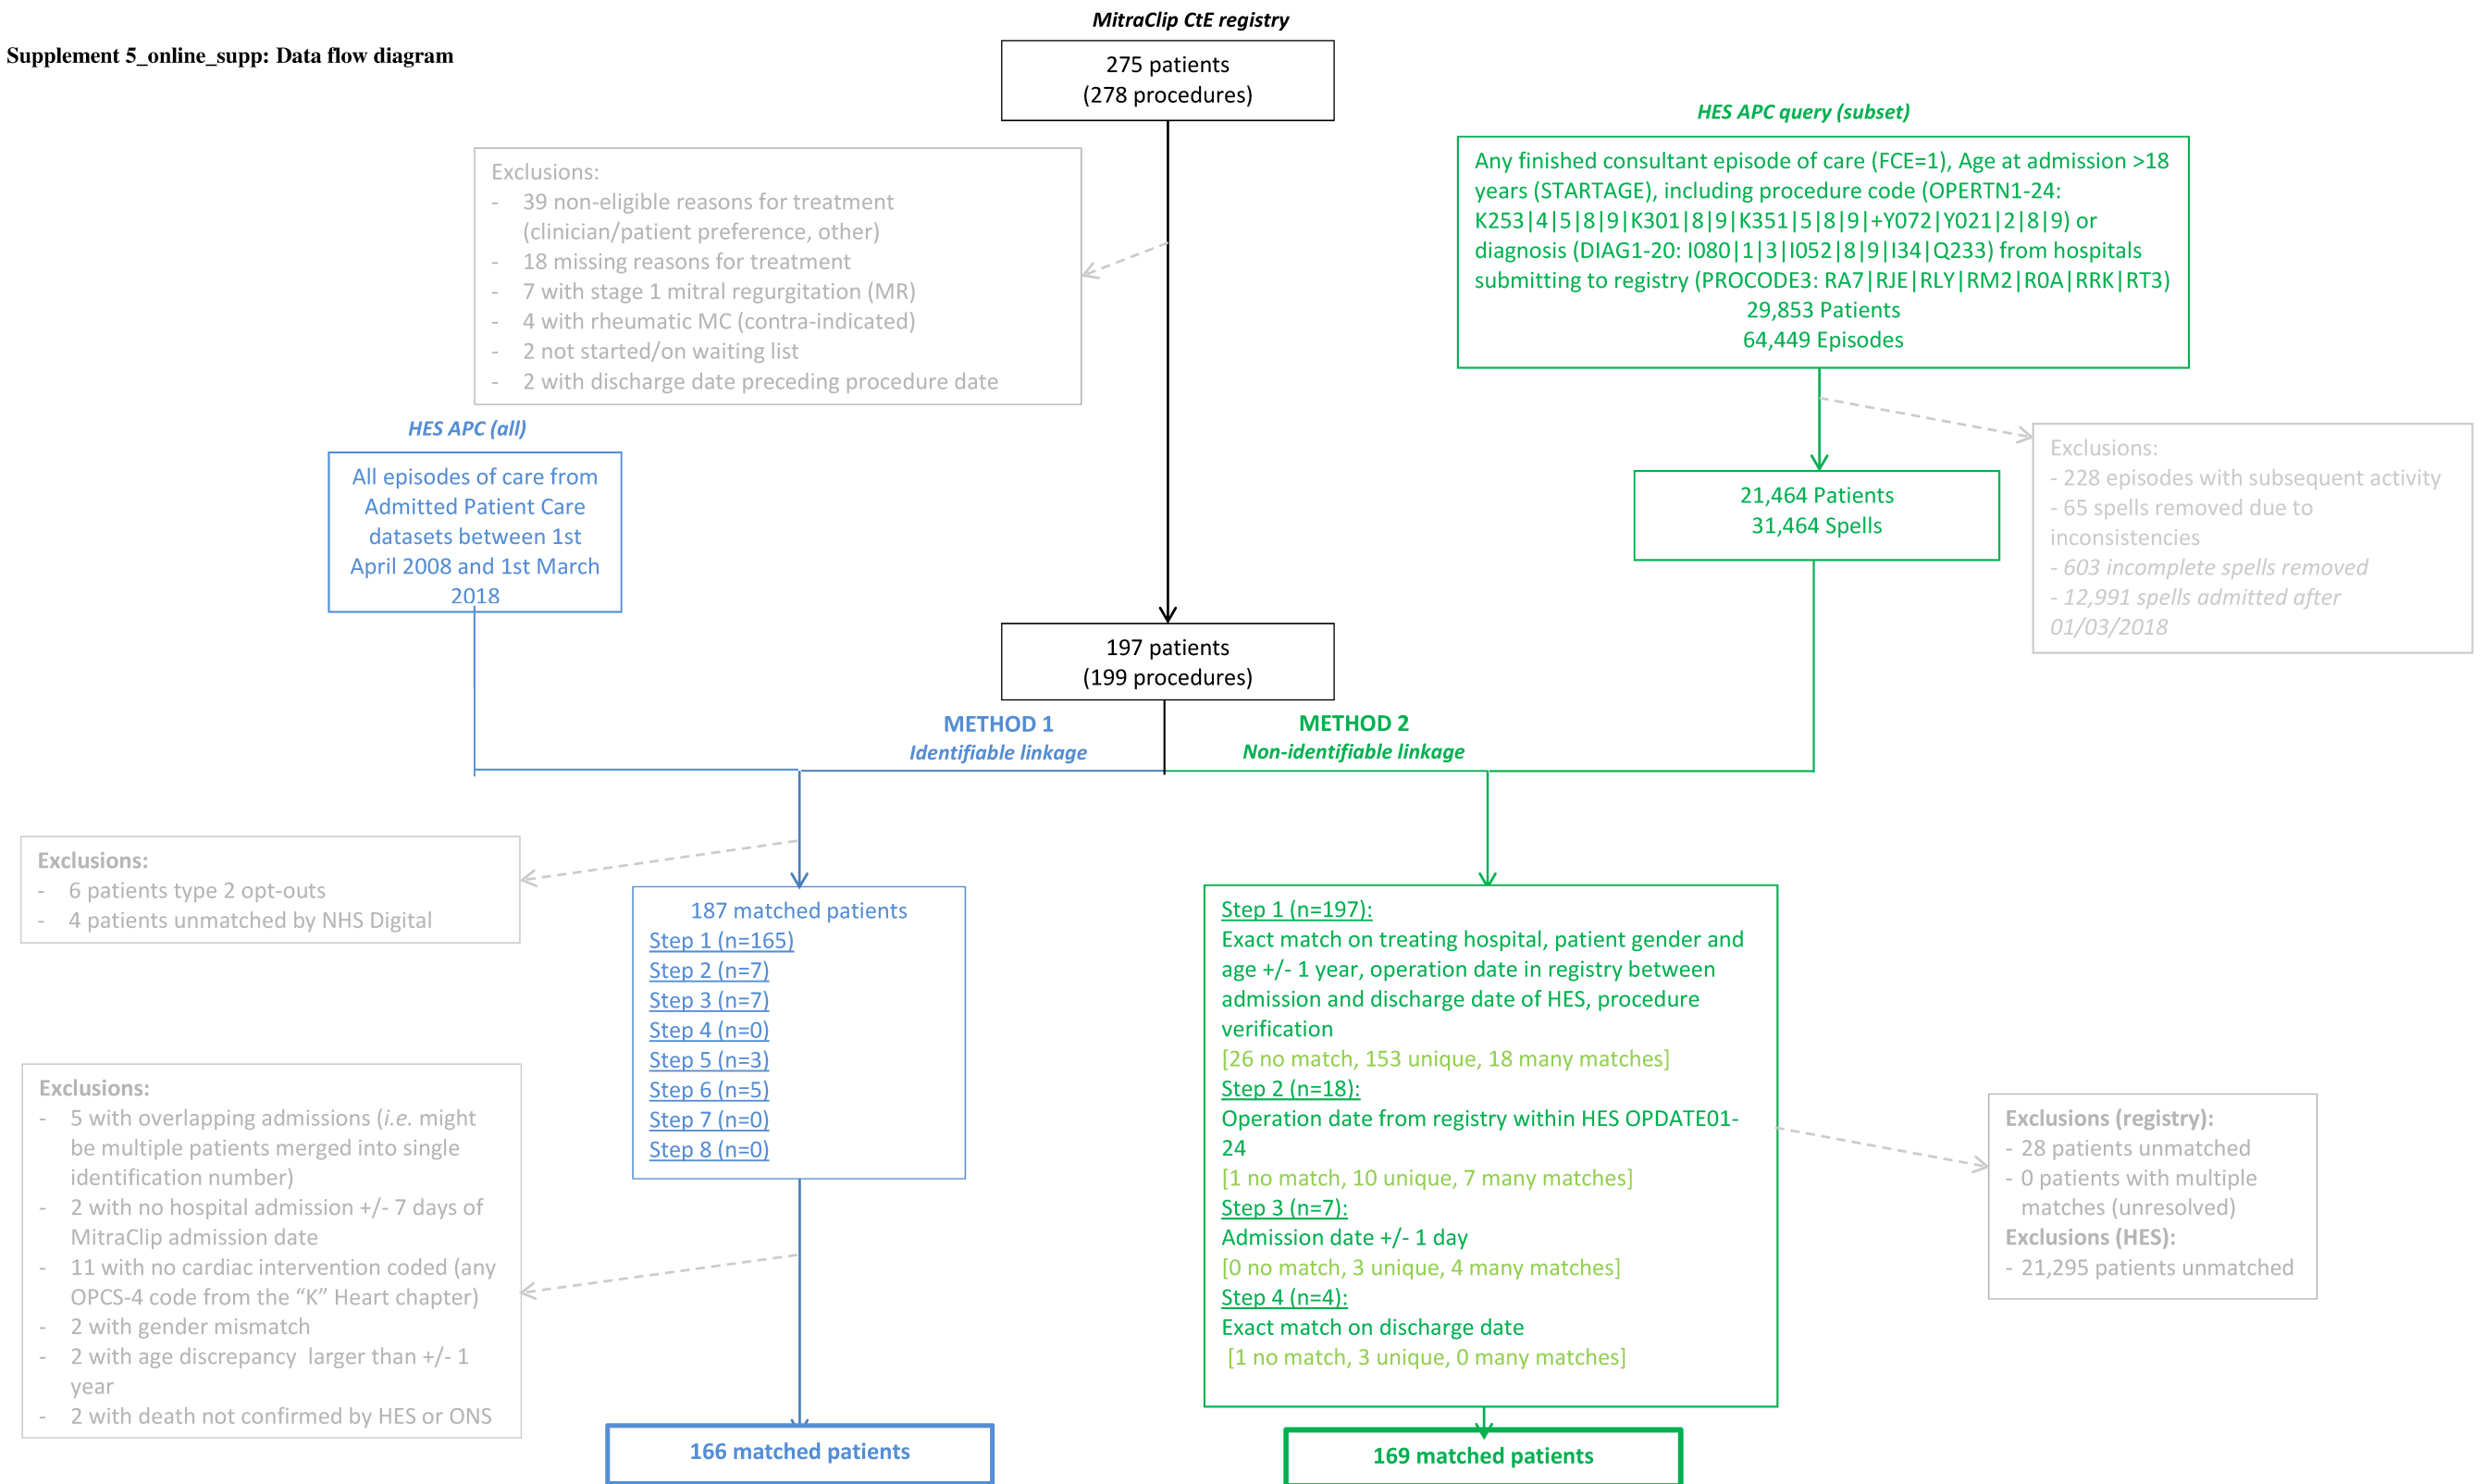

Supplement: bmjhci-2020-100223supp001.pdf [file bmjhci-2020-100223supp001.pdf]
